# Supplementary material
Source: MDPI journal article supplement (https://www.mdpi.com/2313-0105/9/3/175)
Supplement: s1 [file s1]

# Electronic Supplemental Information

## Density functional theory study of oxygen evolution reaction mechanism on rare earth Sc-doped graphene

Yiwen Liu <sup>1</sup>, Mengqi Liao <sup>1</sup>, Yuting Hu <sup>1</sup>, Tae Gwan Lee <sup>2</sup>, Ravindranadh Koutavarapu <sup>3,\*</sup>, Shaik Gouse Peera <sup>2,\*</sup>, Chao Liu <sup>1,\*</sup>

<sup>1</sup> Faculty of Materials Metallurgy and Chemistry, Jiangxi University of Science and Technology, Ganzhou 341000, China; [2856056456@qq.com](mailto:2856056456@qq.com) (Y. Liu)

<sup>2</sup> Department of Environmental Science and Engineering, Keimyung University, Daegu 42601, Republic of Korea; [wateree@kmu.ac.kr](mailto:wateree@kmu.ac.kr) (T.G. Lee)

<sup>3</sup> Department of Robotics Engineering, College of Mechanical and IT Engineering, Yeungnam University, Gyeongsan 38541, Republic of Korea

\* Correspondence: [ravindra\\_physicist@ynu.ac.kr](mailto:ravindra_physicist@ynu.ac.kr) (R. Koutavarapu); [gouse@kmu.ac.kr](mailto:gouse@kmu.ac.kr) (S.G. Peera); [liuchao198967@126.com](mailto:liuchao198967@126.com) (C. Liu)

**Table S1**

|              | ScC <sub>3</sub>                   | ScNC <sub>2</sub>                  | ScN <sub>2</sub> C                 | ScN <sub>3</sub>   | ScC <sub>4</sub> | ScNC <sub>3</sub> |
|--------------|------------------------------------|------------------------------------|------------------------------------|--------------------|------------------|-------------------|
| $\Delta E_f$ | 3.94                               | 2.09                               | 0.81                               | -0.20              | 5.26             | 3.245             |
|              | ScN <sub>2</sub> C <sub>2</sub> -h | ScN <sub>2</sub> C <sub>2</sub> -o | ScN <sub>2</sub> C <sub>2</sub> -p | ScN <sub>3</sub> C | ScN <sub>4</sub> |                   |
| $\Delta E_f$ | 1.37                               | 1.38                               | 1.45                               | -0.28              | -1.60            |                   |

Formation energy ( $\Delta E_f$ , eV) of various ScN<sub>x</sub>C<sub>3-x</sub>@SACs and ScN<sub>x</sub>C<sub>4-x</sub>@SACs structures.

**Table S2**

Q(Sc), Q(N) and Q(C) refer to the charge on Sc atom, N and C atoms adjacent to Sc atom, respectively. Q(C<sub>N</sub>) and Q(C<sub>C</sub>) represent the charge of the outer C atoms of N, C atoms connected to Sc atom. The positive and negative numbers represent electrons lost and gained, respectively, based on the analysis of Mulliken charge (Q in e).

|                                    | Q(Sc) | Q(C)   | Q(N)   | Q(C <sub>N</sub> ) | Q(C <sub>C</sub> ) |
|------------------------------------|-------|--------|--------|--------------------|--------------------|
| ScC <sub>3</sub>                   | 0.975 | 1.050  |        |                    | 0.254              |
| ScNC <sub>2</sub>                  | 1.107 | -0.736 | -0.510 | 0.290              | 0.194              |
| ScN <sub>2</sub> C                 | 1.266 | -0.376 | -1.042 | 0.589              | 0.115              |
| ScN <sub>3</sub>                   | 1.424 |        | -1.610 | 0.911              |                    |
| ScC <sub>4</sub>                   | 1.114 | -1.508 |        |                    | 0.300              |
| ScNC <sub>3</sub>                  | 1.167 | -1.153 | -0.485 | 0.293              | -0.712             |
| ScN <sub>2</sub> C <sub>2</sub> -h | 1.237 | -0.731 | -0.527 | 0.639              | 0.114              |
| ScN <sub>2</sub> C <sub>2</sub> -o | 1.255 | -0.791 | -1.028 | 0.643              | 0.115              |
| ScN <sub>2</sub> C <sub>2</sub> -p | 1.248 | -0.780 | -1.044 | 0.532              | 0.220              |
| ScN <sub>3</sub> C                 | 1.368 | -0.386 | -1.629 | 0.888              | 0.072              |
| ScN <sub>4</sub>                   | 1.533 |        | -2.208 | 1.136              |                    |

**Table S3**

The adsorption configurations of different number of OH<sup>-</sup> and H<sub>2</sub>O on various types of ScN<sub>x</sub>C<sub>3-x</sub>@SACs and ScN<sub>x</sub>C<sub>4-x</sub>@SACs.

|                    | *H <sub>2</sub> O                                                                   | *OH                                                                                 | *2OH                                                                                | *3OH                                                                                 | *4OH                                                                                  | *5OH                                                                                  |
|--------------------|-------------------------------------------------------------------------------------|-------------------------------------------------------------------------------------|-------------------------------------------------------------------------------------|--------------------------------------------------------------------------------------|---------------------------------------------------------------------------------------|---------------------------------------------------------------------------------------|
| ScC <sub>3</sub>   | 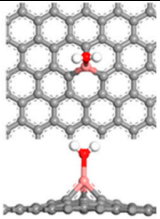   |    |    |    |                                                                                       |                                                                                       |
| ScNC <sub>2</sub>  |    |    |    |    |                                                                                       |                                                                                       |
| ScN <sub>2</sub> C |   |   |   |   |                                                                                       |                                                                                       |
| ScN <sub>3</sub>   |  |  |  |  |  |  |
| ScC <sub>4</sub>   |  |  |  |                                                                                      |                                                                                       |                                                                                       |
| ScNC <sub>3</sub>  |  |  |  |                                                                                      |                                                                                       |                                                                                       |

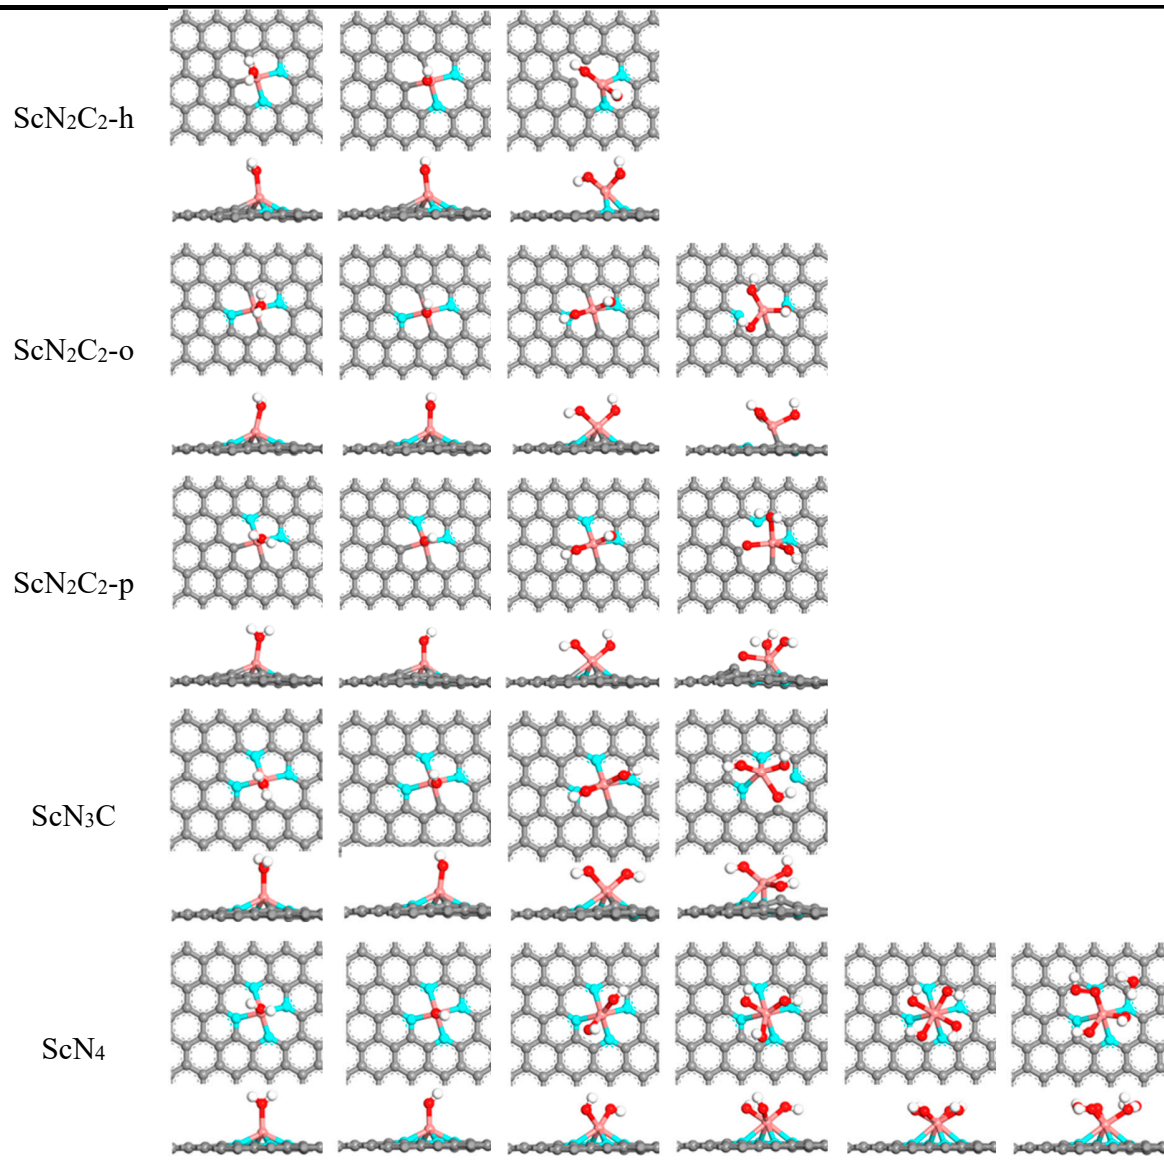

**Table S4**

Adsorption energy data ( $\Delta E_{ads}$ , eV) of H<sub>2</sub>O and different number of OH<sup>-</sup> on ScN<sub>x</sub>C<sub>3-x</sub>@SACs and ScN<sub>x</sub>C<sub>4-x</sub>@SACs.

|                                    | $\Delta E_{ads}^{*H_2O}$ | $\Delta E_{ads}^{*OH}$ | $\Delta E_{ads}^{*2OH}$ | $\Delta E_{ads}^{*3OH}$ | $\Delta E_{ads}^{*4OH}$ |
|------------------------------------|--------------------------|------------------------|-------------------------|-------------------------|-------------------------|
| ScC <sub>3</sub>                   | -0.851                   | -3.45                  | -3.58                   | -2.89                   |                         |
| ScNC <sub>2</sub>                  | -0.912                   | -3.58                  | -3.71                   | -2.98                   |                         |
| ScN <sub>2</sub> C                 | -0.966                   | -4.29                  | -3.12                   | -2.42                   |                         |
| ScN <sub>3</sub>                   | -0.999                   | -4.75                  | -3.96                   | -2.44                   |                         |
| ScC <sub>4</sub>                   | -0.938                   | -3.42                  | -3.72                   |                         |                         |
| ScNC <sub>3</sub>                  | -0.942                   | -3.38                  | -3.10                   |                         |                         |
| ScN <sub>2</sub> C <sub>2</sub> -h | -0.990                   | -3.70                  | -2.86                   |                         |                         |
| ScN <sub>2</sub> C <sub>2</sub> -o | -0.970                   | -3.56                  | -2.35                   | -1.76                   |                         |
| ScN <sub>2</sub> C <sub>2</sub> -p | -0.966                   | -3.59                  | -2.28                   | -5.03                   |                         |
| ScN <sub>3</sub> C                 | -1.030                   | -3.99                  | -2.60                   | -3.44                   |                         |
| ScN <sub>4</sub>                   | -1.052                   | -4.50                  | -2.88                   | -1.89                   | -1.13                   |

**Table S5**

The adsorption configurations of  $^*\text{O}_2$  on  $\text{ScN}_3$  and  $\text{ScN}_4$  with different number of  $\text{OH}^-$ .

|                                    | $^*\text{O}_{2(\text{end on})}$                                                     | $^*\text{O}_{2(\text{side on})}$                                                      |
|------------------------------------|-------------------------------------------------------------------------------------|---------------------------------------------------------------------------------------|
| $\text{ScN}_3$                     | 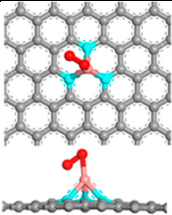   |    |
| $\text{Sc}(\text{OH})\text{N}_3$   |    |    |
| $\text{Sc}(\text{OH})_2\text{N}_3$ |   |                                                                                       |
| $\text{ScN}_4$                     |  |  |
| $\text{Sc}(\text{OH})\text{N}_4$   |  |  |
| $\text{Sc}(\text{OH})_2\text{N}_4$ |  |                                                                                       |

**Table S6**

Adsorption energy ( $\Delta E_{ads}$ , eV) of  $\text{ScN}_3$  and  $\text{ScN}_4$  with different number of OH ligands for adsorbed  $\text{O}_2$ .

|                             | $\Delta E_{ads}^{*\text{O}_2(\text{end on})}$ | $\Delta E_{ads}^{*\text{O}_2(\text{side on})}$ |                             | $\Delta E_{ads}^{*\text{O}_2(\text{end on})}$ | $\Delta E_{ads}^{*\text{O}_2(\text{side on})}$ |
|-----------------------------|-----------------------------------------------|------------------------------------------------|-----------------------------|-----------------------------------------------|------------------------------------------------|
| $\text{ScN}_3$              | -3.52                                         | -3.64                                          | $\text{ScN}_4$              | -1.75                                         | -2.80                                          |
| $\text{Sc(OH)N}_3$          | -1.26                                         | -2.09                                          | $\text{Sc(OH)N}_4$          | -0.42                                         | -0.88                                          |
| $\text{Sc(OH)}_2\text{N}_3$ | -0.05                                         |                                                | $\text{Sc(OH)}_2\text{N}_4$ | 0.25                                          |                                                |

**Table S7**

The adsorption configurations of  $^*\text{OH}$ ,  $^*\text{OOH}$ ,  $^*\text{O}$ ,  $^*\text{H}_2\text{O}$  and  $^*\text{O}_2$  on  $\text{Sc(OH)}_2\text{N}_3$  and  $\text{Sc(OH)}_2\text{N}_4$ .

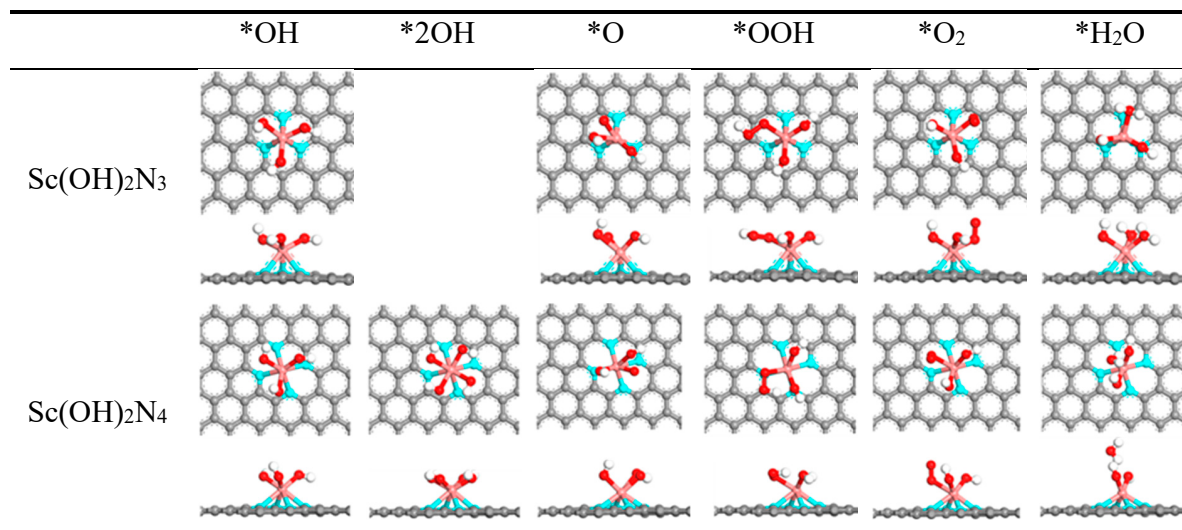**Table S8**

Adsorption energy data ( $\Delta E_{ads}$ , eV) of reactive species on  $\text{Sc(OH)}_2\text{N}_4$  and  $\text{Sc(OH)}_2\text{N}_3$ .

|                             | $\Delta E_{ads}^{*\text{OH}}$ | $\Delta E_{ads}^{*\text{O}}$ | $\Delta E_{ads}^{*\text{OOH}}$ | $\Delta E_{ads}^{*\text{O}_2(\text{end on})}$ | $\Delta E_{ads}^{*\text{H}_2\text{O}}$ |
|-----------------------------|-------------------------------|------------------------------|--------------------------------|-----------------------------------------------|----------------------------------------|
| $\text{Sc(OH)}_2\text{N}_3$ | -2.44                         | -2.98                        | -1.21                          | -0.05                                         | -0.70                                  |
| $\text{Sc(OH)}_2\text{N}_4$ | -1.89                         | -2.67                        | -0.94                          | 0.25                                          | -0.51                                  |

**Table S9**

Free energy change ( $\Delta G$ , eV) of  $\text{ScN}_3$  and  $\text{ScN}_4$  to produce  $\text{Sc(OH)}_2\text{N}_3$  and  $\text{Sc(OH)}_2\text{N}_4$ .

|                | $\Delta G^{*\text{OH}^- \rightarrow \text{OH}}$ | $\Delta G^{*\text{OH} + \text{OH}^- \rightarrow 2\text{OH}}$ |
|----------------|-------------------------------------------------|--------------------------------------------------------------|
| $\text{ScN}_3$ | -2.19                                           | -1.36                                                        |
| $\text{ScN}_4$ | -1.98                                           | -0.28                                                        |

**Table S10**

Free energy changes of  $\Delta G_x$  ( $x=1-4$ , eV) and overpotential ( $\eta$ , V) of  $\text{Sc(OH)}_2\text{N}_3$  and  $\text{Sc(OH)}_2\text{N}_4$ .

|                                               | $\Delta G_1$ | $\Delta G_2$ | $\Delta G_3$ | $\Delta G_4$ | $\eta$ |
|-----------------------------------------------|--------------|--------------|--------------|--------------|--------|
| $\text{Sc(OH)}_2\text{N}_3$                   | 0.08         | 1.43         | 0.15         | -0.06        | 1.03   |
| $\text{Sc(OH)}_2\text{N}_4(\text{pathway 1})$ | 0.57         | 1.50         | 0.17         | -0.34        | 0.80   |
| $\text{Sc(OH)}_2\text{N}_4(\text{pathway 2})$ | 0.57         | 1.20         | -0.13        | -0.34        | 1.10   |

**Table S11**

Free energy change ( $\Delta G$ , eV) of  $\text{H}_2\text{O}_2$  formation.

|                             | $\Delta G^{*\text{OOH} + \text{OH}^- \rightarrow \text{O} + \text{H}_2\text{O}_2}$ | $\Delta G^{*2\text{OH} + \text{OH}^- \rightarrow \text{OH} + \text{H}_2\text{O}_2}$ |
|-----------------------------|------------------------------------------------------------------------------------|-------------------------------------------------------------------------------------|
| $\text{Sc(OH)}_2\text{N}_3$ | 3.58                                                                               |                                                                                     |
| $\text{Sc(OH)}_2\text{N}_4$ | 3.56                                                                               | 2.23                                                                                |



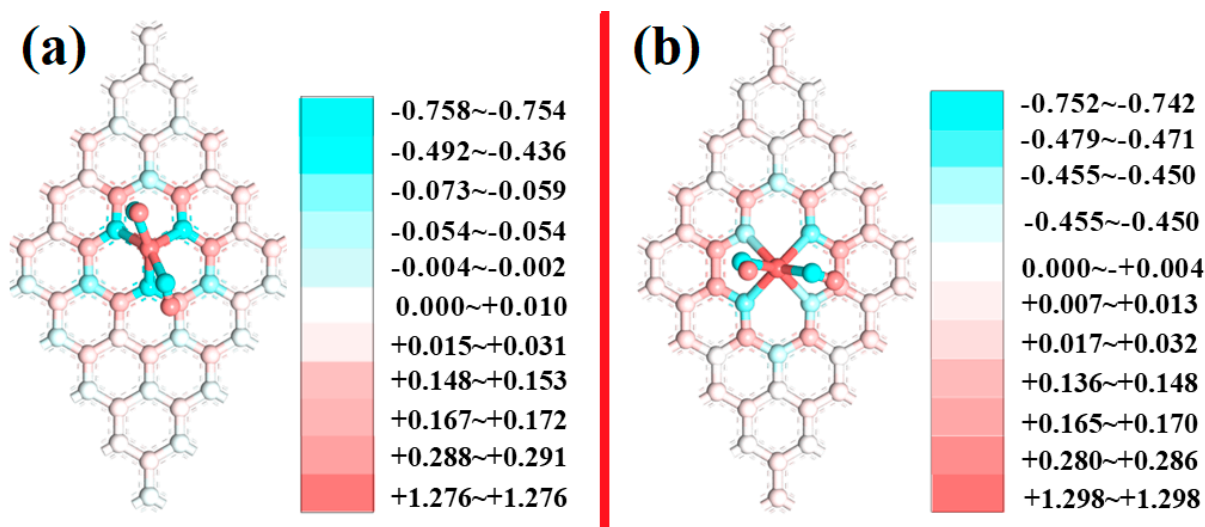

**Fig. S1.** The Mulliken charge analysis of (a)  $\text{Sc}(\text{OH})_2\text{N}_3$  and (b)  $\text{Sc}(\text{OH})_2\text{N}_4$ .

**Table S12**

$Q(\text{Sc})$  and  $Q(\text{N})$  refer to the charge on Sc atom and N atom adjacent to Sc atom, respectively.  $Q(\text{C}_\text{N})$ ,  $Q(\text{O}_\text{Sc})$  and  $Q(\text{H}_\text{O})$  represent the charge of the outer C atoms of N atoms connected to Sc atom, the O atoms connected to Sc atom and the H atoms connected to O atoms. The positive and negative numbers represent electrons lost and gained, respectively, based on the analysis of Mulliken charge ( $Q$  in e).

|                                    | $Q(\text{Sc})$ | $Q(\text{N})$ | $Q(\text{C}_\text{N})$ | $Q(\text{O}_\text{Sc})$ | $Q(\text{H}_\text{O})$ |
|------------------------------------|----------------|---------------|------------------------|-------------------------|------------------------|
| $\text{Sc}(\text{OH})_2\text{N}_3$ | 1.276          | -1.388        | 0.962                  | -1.512                  | 0.579                  |
| $\text{Sc}(\text{OH})_2\text{N}_4$ | 1.298          | -1.855        | 1.218                  | -1.492                  | 0.566                  |
